# Supplementary material for: Walking on water: terrestrial mammal migrations in the warming Arctic
Source: publisher site journal article supplement (doi:10.1515/ami-2020-0111), 2021-01-01
Supplement: Supplementary file 1 [file ami-2020-0111_sm.xlsx]

## Sheet: ReadMe
The Excel file named “Berteaux and Lai_SuppMat” contains two sheets. The first sheet named “Movement type categorization” shows the movement type (M = migratory, N = non-migratory, U = Unclear movement pattern but possibly migratory, D = data deficient) of the 70 species of Arctic terrestrial mammals recognized by Reid et al. [3]. Data come from Gnanadesikan et al. [9], expect for updates made by…
[3] Reid D.G., Berteaux D., Laidre K.L., (Lead authors), and 32 Contributing Authors, Chapter 3 - Mammals, In: Arctic Biodiversity Assessment: Status and Trends in Arctic Biodiversity, Conservation of Arctic Flora and Fauna (CAAF), Arctic Council, Iceland, 2013, 78–141
[9] Gnanadesikan G.E., Pearse W.D., Shaw A.K., Evolution of mammalian migrations for refuge, breeding, and food, Ecol. Evol., 2017, 7, 5891–5900

## Sheet: Movement type categorization
Class	Order	Family	Genus	Species	Possible synonyms	Common name	Movement type	References	Notes from Gnanadesikan et al. 2017	Notes by Berteaux and Lai (2021)
MAMMALIA	CARNIVORA	CANIDAE	Canis	latrans		American Jackal, Brush Wolf, Coyote, Prairie Wolf	N	100	Non-migratory [100]. Eat animals, plants. Scavengers. Usually monogamous. Breeding once a year, one pair per pack. Ranging and dispersal behaviors, but not migratory [100].
MAMMALIA	CARNIVORA	CANIDAE	Canis	lupus		Arctic Wolf, Common Wolf, Gray Wolf, Grey Wolf, Mexican Wolf, Plains Wolf, Timber Wolf, Tundra Wolf, Wolf	M	537; 3642	Walking migrant [3642] Non-migratory [100]. Tracking [3642]. Follow migratory caribou prey [3642]. Migration not obligatory/universal. "All satellite-collared wolves showed a distinct migratory pattern, leaving the tundra denning areas in autumn and moving over large areas throughout the winter, before returning to the tundra to give birth in early spring", seem to track caribou since individuals…
MAMMALIA	CARNIVORA	CANIDAE	Vulpes	lagopus	Alopex lagopus	Arctic Fox, Polar Fox	M (N)	100; A12; A15	Non-migratory [100]. Solitary. Primary prey: lemmings and voles. Range long distance when food is scarce, but no true migration [100].	A small proportion of individuals may leave their territories for extended times during winter but return to the tundra and same den sites in spring [A12]. Because a seasonal change of habitats (tundra to sea ice) also sometimes occur [A12, A15], we consider the Arctic fox as migratory/partially migratory.
MAMMALIA	CARNIVORA	CANIDAE	Vulpes	vulpes		Cross Fox, Red Fox, Silver Fox	U (N)	100; A8	Non-migratory [100]. Opportunistic in feeding with variable diet between location and season. Territorial with variable home range size (20-2,000 ha), young disperse (male average 29 km, female 8 km), no migration [100].	Altitudinal range shifts were reported in Alaska [A8]. "Seasonal range shifts and movements were common" [A8].
MAMMALIA	CARNIVORA	FELIDAE	Lynx	canadensis		American Lynx, Canada Lynx	N	100	Non-migratory [100]. Home ranges 11-300 square km, females overlap. Daily movements 5-10 km. Maximum dispersal recorded 483 km [100].
MAMMALIA	CARNIVORA	FELIDAE	Lynx	lynx		Eurasian Lynx	N	3477	Non-migratory [3477]. home range size of 248km^2 (males) and 133km^2 (females) [3477].
MAMMALIA	CARNIVORA	MUSTELIDAE	Gulo	gulo		Wolverine	M (U)	100; 520; 521; A13; A21	Unclear movement, altitudinal shifts of ~100m, 149m 225m and 549m observed in different locations [521]. Tracking? Possibly also refuge? [521]. Food (ungulate carrion), possibly temperature [521]. Annual home ranges 100-600 square km. Female ranges smaller than males [100]. Seasonal movements. Daily movements over 30 km recorded. Long distance movements driven by food availability [520].	Tracking studies confim altitudinal shifts are common in the Arctic [A13, A21].
MAMMALIA	CARNIVORA	MUSTELIDAE	Lontra	canadensis		North American Otter, North American River Otter, Northern River Otter	N	82; 84	Non-migratory [84].
MAMMALIA	CARNIVORA	MUSTELIDAE	Mustela	erminea		Ermine, Short-tailed Weasel, Stoat	N	100; 515	Non-migratory [100, 515]. Territorial [100].
MAMMALIA	CARNIVORA	MUSTELIDAE	Mustela	nivalis		Least Weasel, Weasel	N	100; 518	Non-migratory [100, 518]. Home ranges, males 7-15 ha, females 1-4 ha. Male and female ranges overlap [100]. Dens not permanent. Stability of home ranges varies [518].
MAMMALIA	CARNIVORA	MUSTELIDAE	Neovison	vison	Mustela vison	American Mink	N	100; 519	Non-migratory [519]. Male home ranges can exceed 0.5 mi along waterway [100]. Movements consist of daily movements 0-12 km, juvenile dispersal up to 45 km, and male movement during mating season [518]. Confusing species divisionsâ€¦
MAMMALIA	CARNIVORA	URSIDAE	Ursus	americanus		American Black Bear	U	100	Unclear movement, Forage up to 200 km outside normal range before hibernation. Cubs remember locations and return [100]. Tracking [100]? Fruits, nuts, other food [100]. Male dispersals up to 219 km, avg 61 km. Behavioral and physiological cycle dependent on plant growth and fruiting. Hibernation timed with breeding [100].
MAMMALIA	CARNIVORA	URSIDAE	Ursus	arctos		Brown Bear, Grizzly Bear, Mexican Grizzly Bear	M	40; 100	Migratory [40], None observed [100]. Tracking [40]. Seasonal fish, berries [40]. Omnivorous. Wide-ranging, territorial. Tolerant to both heat and cold, den in the cold [100], "Seasonal movements are primarily towards major food sources, such as salmon streams and areas of high berry production (Jonkel 1978). In Siberia, individuals may travel hundreds of kilometers during the autumn to reach area…
MAMMALIA	CETARTIODACTYLA	BOVIDAE	Ovibos	moschatus		Muskox, Musk Ox	M	3380; 3646; A1; A16	Walking migrant (historical) [3646] Unclear movement [3380]. Unknown motivation [3646]. "Typically, muskoxen live in mixed sex and age herds or small male bachelor herds which have home ranges within which muskoxen move between seasonal ranges." [3380], early observations that spent summer on Arctic islands and winter on mainland, more recent reports suggest shorter migrations or none -- suggests…	Recent tracking studies report muskoxen as being largely nomadic in a rather small geographical area, with a few individuals showing site fidelity [A1, A16]. "Some appeared to exhibit a repeated cycle of annual movements" [A1]. Some individuals dispersed but then gradually moved back to the collaring site [A16].
MAMMALIA	CETARTIODACTYLA	BOVIDAE	Ovis	dalli		Dall's Sheep, Thinhorn Sheep	M	1218	Walking migrant [1218]. refuge [1218]. avoid deep snow [1218]. most populations migrate between summer and winter ranges, although some do not [1218].
MAMMALIA	CETARTIODACTYLA	BOVIDAE	Ovis	nivicola		Snow Sheep	U	3381	Unclear movement [3381]. "It is generally non-migratory, but it makes seasonal short distance movements" [3381].
MAMMALIA	CETARTIODACTYLA	CERVIDAE	Alces	alces		Elk, Eurasian Elk, Eurasian Moose, European Elk, Moose, Siberian Elk	M	1207; A18	Walking migrant [1207]. Refuge [1207]. move to avoid deep snow in winter [1207]. "although snow may not cause moose migrations, it does influence the timing and distance of movements" [1207].
MAMMALIA	CETARTIODACTYLA	CERVIDAE	Alces	americanus		Moose, Siberian Elk	M	3260	Walking migrant [3260]. Tracking? [3260]. Move in search of food [3260]. Migration not obligatory/universal [3260]. some populations migrate during the year up to 180km, others are sedentary, both types have home ranges (?) [3260].
MAMMALIA	CETARTIODACTYLA	CERVIDAE	Rangifer	tarandus		Caribou, Peary Caribou, Reindeer	M	40; 1220	Walking migrant [1220]. refuge [1220]. leave areas with predators/high food for areas with low predators/low food [1220]. "most populations have seasonal shifts in ranges" [40]. variety of plants [40].
MAMMALIA	EULIPOTYPHLA	SORICIDAE	Sorex	araneus		Common Shrew, Eurasian Shrew	N	2560	Non-migratory [2560]. home range listed in meta-analysis [2560].
MAMMALIA	EULIPOTYPHLA	SORICIDAE	Sorex	caecutiens		Laxmann's Shrew, Masked Shrew, MASKED SHREW	N	2560	Non-migratory [2560]. home range listed in meta-analysis [2560].
MAMMALIA	EULIPOTYPHLA	SORICIDAE	Sorex	cinereus		Cinereus Shrew, Masked Shrew	N	2560	Non-migratory [2560]. home range listed in meta-analysis [2560].
MAMMALIA	EULIPOTYPHLA	SORICIDAE	Sorex	hoyi		American Pygmy Shrew, Pygmy Shrew	D	2744
MAMMALIA	EULIPOTYPHLA	SORICIDAE	Sorex	jacksoni		Saint Lawrence Island Shrew, St Lawrence Island Shrew	D	2746
MAMMALIA	EULIPOTYPHLA	SORICIDAE	Sorex	minutissimus		Eurasian Least Shrew, Least Shrew, Least Siberian Shrew, Miniscule Shrew	N	2560	Non-migratory [2560]. home range listed in meta-analysis [2560].
MAMMALIA	EULIPOTYPHLA	SORICIDAE	Sorex	minutus		Eurasian Pygmy Shrew, Pygmy Shrew	N	2560	Non-migratory [2560]. home range listed in meta-analysis [2560].
MAMMALIA	EULIPOTYPHLA	SORICIDAE	Sorex	monticolus		Dusky Shrew, Montane Shrew	N	2560	Non-migratory [2560]. home range listed in meta-analysis [2560].
MAMMALIA	EULIPOTYPHLA	SORICIDAE	Sorex	portenkoi		Portenko's Shrew	D	2765
MAMMALIA	EULIPOTYPHLA	SORICIDAE	Sorex	pribilofensis		Pribilof Island Shrew	D	2767
MAMMALIA	EULIPOTYPHLA	SORICIDAE	Sorex	roboratus		Flat-skulled Shrew	D	2769
MAMMALIA	EULIPOTYPHLA	SORICIDAE	Sorex	tundrensis		Tundra Shrew, TUNDRA SHREW	D	2782
MAMMALIA	EULIPOTYPHLA	SORICIDAE	Sorex	ugyunak		Barren Ground Shrew	D	2783
MAMMALIA	EULIPOTYPHLA	SORICIDAE	Sorex	yukonicus		Alaska Tiny Shrew, Least Shrew, Least Siberian Shrew, Miniscule Shrew	D	2789
MAMMALIA	LAGOMORPHA	LEPORIDAE	Lepus	americanus		Snowshoe Hare, Snowshoe Rabbit, Varying Hare	N (D)	2251; A5; A14		Among 300 collared hares (2008-2013), 91% and 95% were recovered within 1 and 2 km, respectively. Sedentary, but can move considerable distances without actually shifting their home ranges [A5]. "snowshoe hares do not usually move great distances (...) adult hares remained within a small area even over long periods of time" [A14].
MAMMALIA	LAGOMORPHA	LEPORIDAE	Lepus	arcticus		Arctic Hare	U	2252; A6	Unclear movement [2252]. summer home ranges of 52-69Ha (females) and 116-155Ha (males), may be migratory since most disappear in summer moving northward in Jun and southward in Nov [2252, A6].
MAMMALIA	LAGOMORPHA	LEPORIDAE	Lepus	othus		Alaskan Hare	D	2270
MAMMALIA	LAGOMORPHA	LEPORIDAE	Lepus	timidus		Arctic Hare, Mountain Hare	M	2249; 3640	Walking migrant [3640]; Non-migratory [2249]. Refuge [3640]. Avoid hard snow [3640]. Migration not obligatory/universal. "but when the snow is hard, they move 5-10km to lower ground to feed; long migrations have been recorded in Russia (Ognev, 1940)." [3640]. home ranges were 113HA (males) and 89Ha (females) [2249].
MAMMALIA	LAGOMORPHA	OCHOTONIDAE	Ochotona	collaris		Collared Pika	N	2309	Non-migratory [2309]. home range of 30m diameter [2309].
MAMMALIA	LAGOMORPHA	OCHOTONIDAE	Ochotona	hyperborea		Northern Pika	N	2319	Non-migratory [2319]. estimates home range to be 30m diameter [2319].
MAMMALIA	LAGOMORPHA	OCHOTONIDAE	Ochotona	turuchanensis		Turuchan Pika	D	2335
MAMMALIA	RODENTIA	CASTORIDAE	Castor	canadensis		American Beaver	N (D)	217; 668; A11	cache food for winter [668]. nonwoody vegetation in summer, woody vegetation winter [668].	Colonial, territorial, remain in their nests during winter. "Beavers build elaborate nests and burrows, and store food for winter use" [A11].
MAMMALIA	RODENTIA	CRICETIDAE	Alticola	lemminus		Lemming Vole	D	1335	mosses, lichens [1335].
MAMMALIA	RODENTIA	CRICETIDAE	Arvicola	amphibius	Arvicola terrestris	Eurasian Water Vole, European Water Vole, Water Vole	N	208; 1343	Non-migratory [1343]. lives in complex burrows [208], strong population fluctuations [217; population studied over 2 years had similar dispersion patterns, evidence of dispersal not migration [1343]. succulent vegetation, insects, mollusks, fish [208].
MAMMALIA	RODENTIA	CRICETIDAE	Dicrostonyx	groenlandicus		Neartic Collared Lemming, Northern Collared Lemming	D	668	leaves, forbs [668].
MAMMALIA	RODENTIA	CRICETIDAE	Dicrostonyx	hudsonius		Labrador Collared Lemming, Ungava Collared Lemming	D	668	vegetation [668].
MAMMALIA	RODENTIA	CRICETIDAE	Dicrostonyx	nelsoni		Nelson's Collared Lemming, Nelson's Collred Lemming, Ungava Collared Lemming	D	1369
MAMMALIA	RODENTIA	CRICETIDAE	Dicrostonyx	nunatakensis		Ogilvie Mountains Collared Lemming	D	1370
MAMMALIA	RODENTIA	CRICETIDAE	Dicrostonyx	richardsoni		Richardson's Collared Lemming	D	1371
MAMMALIA	RODENTIA	CRICETIDAE	Dicrostonyx	torquatus		Arctic Lemming, Palearctic Collared Lemming	D	1372	extreme abundance cycles every 3 years [1372].
MAMMALIA	RODENTIA	CRICETIDAE	Dicrostonyx	unalascensis		Umnak Island Collared Lemming, Unalaska Collared Lemming	D	1373
MAMMALIA	RODENTIA	CRICETIDAE	Dicrostonyx	vinogradovi		Wrangel Island Collared Lemming, Wrangel Lemming	D	1374	Data deficient, population cycles [1374].
MAMMALIA	RODENTIA	CRICETIDAE	Lemmus	amurensis		Amur Lemming	D	1405
MAMMALIA	RODENTIA	CRICETIDAE	Lemmus	lemmus		Norway Lemming	M	217; A7	Walking migrant [217]. Unknown motivation. "during migrations it can be found in forest areas, on frozen lakes, and on agricultural land", strong population cycles in south, irregular in north [217].	"the seasonal change of habitat is an essential feature of the biology of L. lemmus" [A7]. Spring movement is initiated by snow melt while the timing of autumn movement is "closely related to the population density and the termination of the summer breeding season"; short seasonal movements turn to mass emigration at high population densities [A7].
MAMMALIA	RODENTIA	CRICETIDAE	Lemmus	portenkoi			D	1406	Data deficient, population fluctuates but appears to be part of life cycle [1406].
MAMMALIA	RODENTIA	CRICETIDAE	Lemmus	sibiricus		Brown Lemming, BROWN LEMMING, Siberian Brown Lemming, SIBERIAN BROWN LEMMING	M	1408; A4	Walking migrant [1408]. Unknown motivation. population cycles with 3-4 year period, "Like Lemmus lemmus, this species has large population fluctuations with a 3-4 year cycle; however, migrations are less pronounced" [1408].	"local migratory movements during snow melt in spring seem typical. These movements rarely exceed one kilometre but may be quite conspicuous in years of high population densities (Chernyavski & Tkachev, 1982). During spring, lemmings have been observed on snow and ice. They have also been reported to cross a one kilometre wide frozen river on the Taimyr Peninsula and to swim over 30 m of open wat…
MAMMALIA	RODENTIA	CRICETIDAE	Lemmus	trimucronatus		Brown Lemming	M (U)	668; A3; A17	Unclear movement [668]. dense populations => reduced reproduction and mass migration [668]. grasses, sedges [668].	Brown lemmings are more common in wet tundra during summer but the density of lemming winter nests in the mesic tundra and associated streams is higher than in the wet tundra, indicating local seasonal movements [A3]. Preferred winter habitat is where snow is deep [A3, A17].
MAMMALIA	RODENTIA	CRICETIDAE	Microtus	abbreviatus		Insular Vole	D	1416
MAMMALIA	RODENTIA	CRICETIDAE	Microtus	gregalis		Narrow-headed Vole	D	208	legumes, cereals [208].
MAMMALIA	RODENTIA	CRICETIDAE	Microtus	levis	Microtus rossiaemeridionalis	East European Vole, Sibling Vole	D	217	annual population fluctuations [217].
MAMMALIA	RODENTIA	CRICETIDAE	Microtus	middendorffii		Middendorff's Vole, Middendorf's Vole	D	1428	sedges, leaves, stalks in summer, roots in winter [1428].
MAMMALIA	RODENTIA	CRICETIDAE	Microtus	miurus		Singing Vole	N	668; 1449	Non-migratory [1449]. colonial, food caches [668], home range but only in June/August [1449]. forbes, leaves [668].
MAMMALIA	RODENTIA	CRICETIDAE	Microtus	oeconomus		Root Vole, Tundra Vole	D	208; 668	digs extensive burrows [208]. sedges, grasses, seeds [668].
MAMMALIA	RODENTIA	CRICETIDAE	Myodes	rufocanus	Clethrionomys rufocanus	Gray Red-backed Vole, Grey Red-backed Vole, GREY-SIDED VOLE	D	208	green leaves, shoots, seeds [208].
MAMMALIA	RODENTIA	CRICETIDAE	Myodes	rutilus	Clethrionomys rutilus	Northern Red-backed Vole, RED VOLE	D	208; 217	digs burrows [208]. seeds [217].
MAMMALIA	RODENTIA	CRICETIDAE	Ondatra	zibethicus		Muskrat	N	217; 668; 1518	Non-migratory [1518]. in winter builds lodge with chambers [217], home ranges in winter were small in stable, matching studies of small summer home ranges [1518]. aquatic vegetation [668].
MAMMALIA	RODENTIA	DIPODIDAE	Sicista	betulina		Northern Birch Mouse	D	217	no population cycles [217].
MAMMALIA	RODENTIA	MURIDAE	Apodemus	sylvaticus		Long-tailed Field Mouse, Wood Mouse	M	217; 778; 779; A19	Walking migrant [779]. Unknown motivation. home range larger in spring/summer than winter and were 2250m^2 (males) and 1817m^2 (females) [778]; , movement patterns vary seasonally: leave valley in summer to forage in nearby arable fields [779].	In the Arctic, Apodemus sylvaticus is present only in Iceland (introduced), where its spatial ecology is still understudied. However, it was suggested individuals could also seasonally move between micro-habitats in Iceland [A19].
MAMMALIA	RODENTIA	SCIURIDAE	Marmota	camtschatica		Black-capped Marmot	N (D)	1728; A2		Colonial, hibernate for 8-9 months; 2-3 families may hibernate together in the same winter den. [A2]
MAMMALIA	RODENTIA	SCIURIDAE	Marmota	broweri		Alaska Marmot	N (D)	1727; A9		Colonial, hibernate for 6-8 months; Winter burrows may be located elsewhere than summer burrows [A9]. "Individual colonies occupy several dens in summer, but the animals hibernate together in a single winter den. (…) Winter dens are normally located on exposed ridges that become free of snow comparatively early in spring relative to other locations" [A9].
MAMMALIA	RODENTIA	SCIURIDAE	Urocitellus	parryii	Spermophilus parryii	Arctic Ground Squirrel	N (D)	668; A10; A20	colonial, burrows [668]. tundra vegetation [668].	Colonial, hibernate for 7-9 months [A20]. Arctic ground squirrels show very restricted movements around burrows in summer and hibernate during winter [A10].

## Sheet: References
References provided in Gnanadesikan et al. 2017.
40. Walker, Ernest P. Walker's Mammals of the World. Ed Ronald M. Nowak, John L. Paradiso. 4th Edition, 1983. Vol II.
82. Lariviere, Serge. Aonyx capensis. Mammalian Species, No. 671. 5 June 2001.
84. Lariviere, Serge, and Lyle R. Walton. Lontra canadensis. Mammalian Species. No 587. 1 June 1998.
100. Wilson, Don E., and Sue Ruff. The Smithsonian Book of North American Mammals. Washington: Smithsonian Inst. P. 1999.
208. Smith, Andrew T., and Yan Xie. A Guide to the Mammals of China. Princeton: Princeton UP. 2008.
217. Mitchell-Jones, A.J., et al. The Atlas of European Mammals. San Diego: Academic Press. 1999.
515. King, Carolyn M. Mustela erminea. Mammalian Species. No 195, pp 1-8. 8 April 1983.
518. Sheffield, Steven R., and Carolyn M. King. Mustela nivalis. Mammalian Species. No. 454, pp 1-10. 2 June 1994.
519. Serge Lariviere. Mustela vison. Mammalian Species. No. 609, pp 1-9. 5 May 1999.
520. Pasitschniak-Arts, Maria, and Serge Lariviere. Gulo Gulo. Mammalian Species. No, 499, pp 1-10. 23 June 1995.
521. Copeland, Jeffrey P., et al. Seasonal Habitat Associations of the Wolverine in Central Idaho. Journal of Wildlife Management. Vol 71, Iss 7. 13 Dec 2010.
668. Adrian Forsyth Mammals of North America: Temperate and Arctic Regions. Buffalo, NY: Firefly Books. 1999.
778. M. C. Crawley. Movements and Home-Ranges of Clethrionomys glareolus Schreber and Apodemus sylvaticus L. in North-East England. Oikos, Vol. 20, No. 2 (1969), pp. 310-319
779. Bo Bergstedt. Home Ranges and Movements of the Rodent Species Clethrionomys glareolus (Schreber), Apodemus flavicollis (Melchior) and Apodemus sylvaticus (Linné) in Southern Sweden. Oikos, Vol. 17, No. 2 (1966), pp. 150-157
1207. Albert W. Franzmann (1981) Alces alces. MAMMALIAN SPECIES No. 154, pp. 1-7.
1218. R. Terry Bowyer and David M. Leslie, Jr. (1992) Ovis dalli. MAMMALIAN SPECIES No. 393, pp. 1-7.
1220. Bergerud et al. Spring migration and dispersion of Woodland Caribou at calving. Anim Behav (1990) vol. 39 pp. 360-368
1335. Tsytsulina, K. 2008. Alticola lemminus. In: IUCN 2011. IUCN Red List of Threatened Species. Version 2011.2. <www.iucnredlist.org>. Downloaded on 17 May 2012.
1343. D. Michael Stoddart. Individual Range, Dispersion and Dispersal in a Population of Water Voles (Arvicola terrestris (L.)). Journal of Animal Ecology 39(2):403-425, 1970.
1369. Linzey, A.V. & NatureServe (Hammerson, G.) 2008. Dicrostonyx nelsoni. In: IUCN 2012. IUCN Red List of Threatened Species. Version 2012.1. <www.iucnredlist.org>. Downloaded on 17 August 2012.
1370. Linzey, A.V. & NatureServe (Morrison, M. & Hammerson, G.) 2008. Dicrostonyx nunatakensis. In: IUCN 2012. IUCN Red List of Threatened Species. Version 2012.1. <www.iucnredlist.org>. Downloaded on 17 August 2012.
1371. Linzey, A.V. & NatureServe (Hammerson, G.) 2008. Dicrostonyx richardsoni. In: IUCN 2012. IUCN Red List of Threatened Species. Version 2012.1. <www.iucnredlist.org>. Downloaded on 17 August 2012.
1372. Tsytsulina, K., Formozov, N. & Sheftel, B. 2008. Dicrostonyx torquatus. In: IUCN 2012. IUCN Red List of Threatened Species. Version 2012.1. <www.iucnredlist.org>. Downloaded on 17 August 2012.
1373. Linzey, A.V. & NatureServe (Garibaldi, A. & Hammerson, G.) 2008. Dicrostonyx unalascensis. In: IUCN 2012. IUCN Red List of Threatened Species. Version 2012.1. <www.iucnredlist.org>. Downloaded on 17 August 2012.
1374. Tsytsulina, K. 2008. Dicrostonyx vinogradovi. In: IUCN 2012. IUCN Red List of Threatened Species. Version 2012.1. <www.iucnredlist.org>. Downloaded on 17 August 2012.
1405. Tsytsulina, K. 2008. Lemmus amurensis. In: IUCN 2012. IUCN Red List of Threatened Species. Version 2012.1. <www.iucnredlist.org>. Downloaded on 19 August 2012.
1406. Tsytsulina, K. 2008. Lemmus portenkoi. In: IUCN 2012. IUCN Red List of Threatened Species. Version 2012.1. <www.iucnredlist.org>. Downloaded on 19 August 2012.
1408. Tsytsulina, K., Formozov, N. & Sheftel, B. 2008. Lemmus sibiricus. In: IUCN 2012. IUCN Red List of Threatened Species. Version 2012.1. <www.iucnredlist.org>. Downloaded on 19 August 2012.
1416. Frey, J. & NatureServe (Garibaldi, A. & Hammerson, G.) 2008. Microtus abbreviatus. In: IUCN 2012. IUCN Red List of Threatened Species. Version 2012.1. <www.iucnredlist.org>. Downloaded on 19 August 2012.
1428. Tsytsulina, K., Formozov, N. & Sheftel, B. 2008. Microtus middendorffii. In: IUCN 2012. IUCN Red List of Threatened Species. Version 2012.1. <www.iucnredlist.org>. Downloaded on 20 August 2012.
1449. George O. Batzli and Heikki Henttonen. Home Range and Social Organization of the Singing Vole (Microtus miurus). 1993. Journal of Mammalogy 74(4): 868-878.
1518. MacKinnon, B. A., and M. B. Burt. 1978. Platyhelminth parasites of muskrats (Ondatra zibethica) in New Brunswick. Canadian J. Zool., 56:350-354.
1728. Tsytsulina, K. 2008. Marmota camtschatica. In: IUCN 2012. IUCN Red List of Threatened Species. Version 2012.1. <www.iucnredlist.org>. Downloaded on 04 October 2012.
2249. R. Hewson and M. D. C. Hinge. 1990. Characteristics of the Home Range of Mountain Hares Lepus timidus. Journal of Applied Ecology 27: 651-666.
2251. Murray, D. & Smith, A.T. 2008. Lepus americanus. In: IUCN 2012. IUCN Red List of Threatened Species. Version 2012.2. <www.iucnredlist.org>. Downloaded on 23 April 2013.
2252. Troy L. Best and Travis Hill Henry. 1994. Lepus arcticus. Mammalian Species 457: 1-9.
2270. Murray, D. & Smith, A.T. 2008. Lepus othus. In: IUCN 2012. IUCN Red List of Threatened Species. Version 2012.2. <www.iucnredlist.org>. Downloaded on 23 April 2013.
2309. Stephen O. MacDonald and Clyde Jones. 1987. Ochotona collaris. Mammalian Species 281: 1-4.
2319. Ryoichi Haga. 1960. Observations on the Ecology of the Japanese Pika. Journal of Mammalogy 41(2): 200-212.
2335. Smith, A.T. & Johnston, C.H. 2008. Ochotona turuchanensis. In: IUCN 2012. IUCN Red List of Threatened Species. Version 2012.2. <www.iucnredlist.org>. Downloaded on 23 April 2013.
2560. M. Genoud. 1988. Energetic strategies of shrews: ecological constraints and evolutionary implications. Mammal Rev. 18(4): 173-193.
2744. NatureServe (Dirrigl Jr., F. & Hammerson, G.) 2008. Sorex hoyi. In: IUCN 2012. IUCN Red List of Threatened Species. Version 2012.2. <www.iucnredlist.org>. Downloaded on 10 May 2013.
2746. Woodman, N., Reid, F. & Matson, J. 2008. Sorex jacksoni. In: IUCN 2012. IUCN Red List of Threatened Species. Version 2012.2. <www.iucnredlist.org>. Downloaded on 10 May 2013.
2765. Tsytsulina, K. 2008. Sorex portenkoi. In: IUCN 2012. IUCN Red List of Threatened Species. Version 2012.2. <www.iucnredlist.org>. Downloaded on 10 May 2013.
2767. Woodman, N., Reid, F. & Matson, J. 2008. Sorex pribilofensis. In: IUCN 2012. IUCN Red List of Threatened Species. Version 2012.2. <www.iucnredlist.org>. Downloaded on 10 May 2013.
2769. Stubbe, M., Samiya, R., Ariunbold, J., Buuveibaatar, V., Dorjderem, S., Monkhzul, Ts., Otgonbaatar, M., Tsogbadrakh, M. & Gankhuyag. 2008. Sorex roboratus. In: IUCN 2012. IUCN Red List of Threatened Species. Version 2012.2. <www.iucnredlist.org>. Downloaded on 10 May 2013.
2782. Tsytsulina, K., Formozov, N., Sheftel, B., Stubbe, M., Samiya, R., Ariunbold, J. & Buuveibaatar, V. 2008. Sorex tundrensis. In: IUCN 2012. IUCN Red List of Threatened Species. Version 2012.2. <www.iucnredlist.org>. Downloaded on 10 May 2013.
2783. NatureServe (Hammerson, G.) 2008. Sorex ugyunak. In: IUCN 2012. IUCN Red List of Threatened Species. Version 2012.2. <www.iucnredlist.org>. Downloaded on 10 May 2013.
2789. NatureServe (Hammerson, G.) 2008. Sorex yukonicus. In: IUCN 2012. IUCN Red List of Threatened Species. Version 2012.2. <www.iucnredlist.org>. Downloaded on 10 May 2013.
3260. Geist, V., Ferguson, M. & Rachlow, J. 2008. Alces americanus. In: IUCN 2012. IUCN Red List of Threatened Species. Version 2012.2. <www.iucnredlist.org>. Downloaded on 12 June 2013.
3380. Gunn, A. & Forchhammer, M. 2008. Ovibos moschatus. In: IUCN 2012. IUCN Red List of Threatened Species. Version 2012.2. <www.iucnredlist.org>. Downloaded on 18 June 2013.
3381. Harris, R.B. & Tsytsulina. K. 2008. Ovis nivicola. In: IUCN 2012. IUCN Red List of Threatened Species. Version 2012.2. <www.iucnredlist.org>. Downloaded on 18 June 2013.
3640. Angerbjörn, Anders and John E. C. Flux (1995) Lepus timidus. Mammalian Species 495: 1-11.
3642. Walton LR, Cluff HD, Paquet PC, Ramsay MA (2001) Movement patterns of barren-ground wolves in the central canadian arctic. Journal of Mammalogy 82(3): 867–876
3646. Baker R (1978) The evolutionary ecology of animal migration (Holmes and Meier, New York).
References provided by Berteaux and Lai 2021.
A1. Anderson, M. and Fergusson, M.A. 2016. Movements and habitat use of muskoxen (Ovibos moschatus) on Bathurst, Cornwallis, and Devon Islanda, 2003-2006. Status report 2016-08. Nunavut Department of Environment, Wildlife research section. Igloolik, NU, Canada.
A2. Cassola, F. 2016. Marmota camtschatica (errata version published in 2017). The IUCN Red List of Threatened Species 2016: e.T12831A115106935.
A3. Duchesne, D., Gauthier, G. and Berteaux, D. 2011. Habitat selection, reproduction and predation of wintering lemmings in the Arctic. Oecologia. 167: 967-980.
A4. Ehrich, D. and Stenseth, N. 2001. Genetic structure of Siberian lemmings (Lemmus sibiricus) in a continuous habitat: large patches rather than isolation by distance. Heredity. 86:716-730.
A5. Feierabend, D., and Kielland. K. 2014. Movements, activity patterns, and habitat use of snowshoe hares (Lepus americanus) in interior Alaska. Journal of Mammalogy. 95: 525-533.
A6. Harper, F. 1956. The mammals of Keewatin. Miscellaneous Publications, Museum of Natural History, University of Kansas. 12:1-94.
A7. Henttonen, H. and Kaikusalo, A. 1993. Lemming movements. In: Stenseth, N. C., Ims, R. A. (eds) The biology of lemmings. Academic Press, London, pp 157–186.
A8. Hobgood, W. T. 1984. Ecology of the red fox (Vulpes vulpes) in the upper Susitna Basin, Alaska. M.Sc. thesis University of Alaska Fairbanks, Fairbanks, Alaska.
A9. Hubbart J. 2011. Current understanding of the Alaska Marmot (Marmota broweri): A sensitive species in a changing environment. Journal of Biology and Life Sciences. 2:6-13.
A10. Hubbs A. H. and Boonstra, R. 1998. Effects of food and predators on the home-range sizes of Arctic ground squirrel (Spermophilus parryii). Canadian Journal of Zoology. 76(3): 592-596.
A11. Jenkins, S. H. and Busher, P. E. 1979. Castor canadensis. Mammalian Species. 120: 1-8.
A12. Lai, S., Bêty, J. and Berteaux, D. 2017. Movement tactics of a mobile predator in a meta-ecosystem with fluctuating resources: the arctic fox in the High Arctic. Oikos. 126:937-947.
A13. Landa, A., Strand, O., Linnell, J. D. C. and Skogland, T. 1998. Home-range sizes and altitude selection for arctic foxes and wolverines in an alpine environment. Canadian Journal of Zoology. 76:448-457.
A14. O'Farrell, T. P. 1965. Home range and ecology of snowshoe hares in interior Alaska. Journal of Mammalogy. 46: 406-418.
A15. Pamperin, N. J., Follmann, E. H. and Person, B., T. 2008. Sea-ice use by arctic foxes in northern Alaska. Polar Biology. 31: 1421. https://doi.org/10.1007/s00300-008-0481-5
A16. Schmidt, N. M., van Beest, F. M., Mosbacher, J. B., Stelvig, M., Hansen, L. H., Nabe-Nielsen, J. and Grøndahl, C. 2016. Ungulate movement in an extreme seasonal environment: year-round movement patterns of high-arctic muskoxen. Wildlife Biology. 22(6):253-267, 215.
A17. Reid, D. G., Bilodeau, F., Krebs, C. J., Gauthier, G., Kenney, A. J., Gilbert, B. S., Leung, M. C. Y., Duchesne, D. and Hofer, E. 2012. Lemming winter habitat choice: a snow-fencing experiment. Oecologia. 168:935-946.
A18. Singh, N. J., Börger, L., Dettki, H., Bunnefeld, N. and Ericsson, G. 2012. From migration to nomadism: movement variability in a northern ungulate across its latitudinal range. Ecological Applications. 22: 2007-2020.
A19. Unnsteinsdóttir, E. R. 2014. The wood mouse Apodemus sylvaticus in Iceland: Population dynamics and limiting factors at the northern edge of the species’ range. PhD thesis. University of Iceland, Reykjavík.
A20. Wheeler, H.C. and Hik, D.S. 2013. Climate change and arctic ground squirrels. Mammal Review. 43: 238-255.
A21. Whitman, J., Ballard, W., and Gardner, C. 1986. Home range and habitat use by wolverines in Southcentral Alaska. The Journal of Wildlife Management. 50(3): 460-463.
